# Supplementary material for: Lycorine hydrochloride suppresses stress‐induced premature cellular senescence by stabilizing the genome of human cells
Source: PubMed Central journal article supplement (PMC7884038; doi:10.1111/acel.13307), 2021-01-17

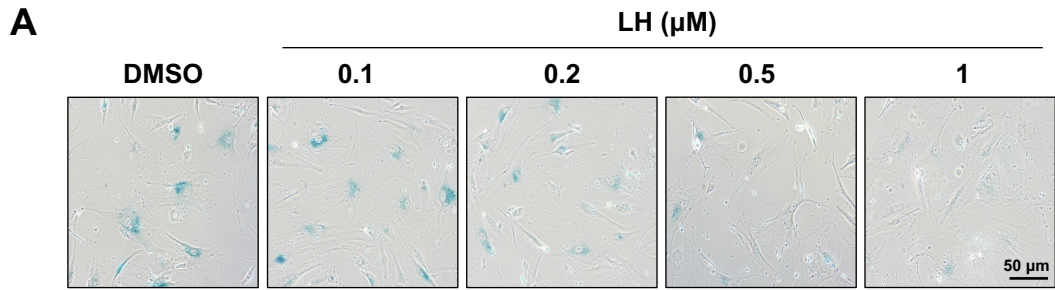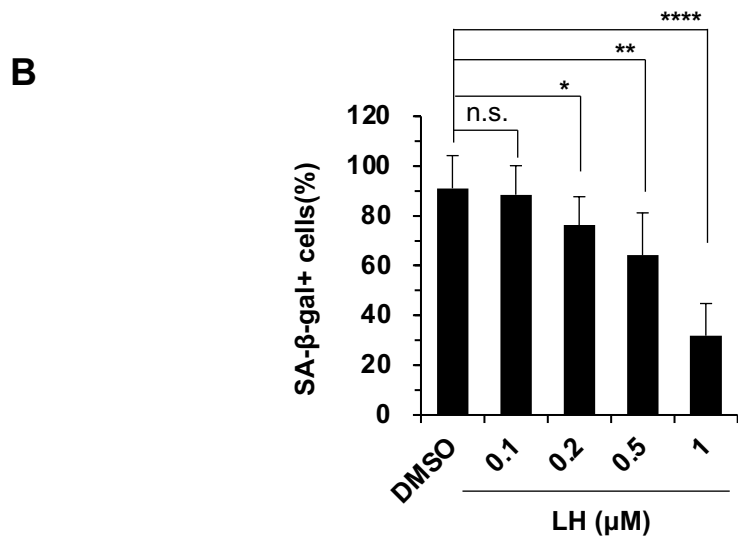

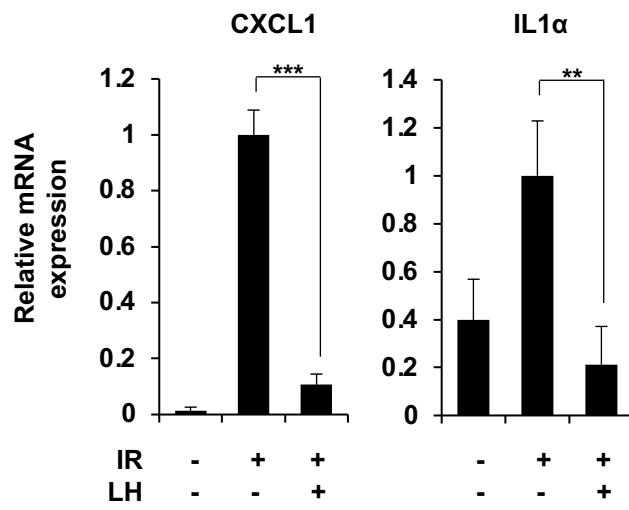

Supplementary Figure 2

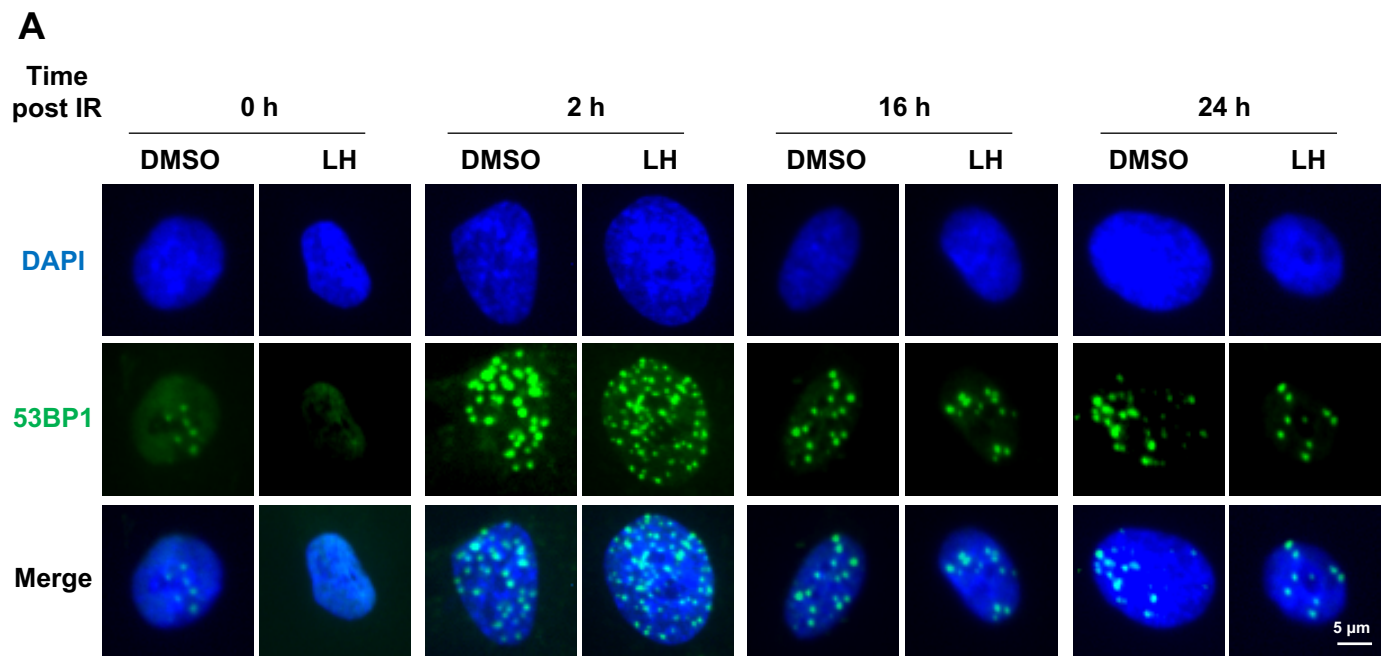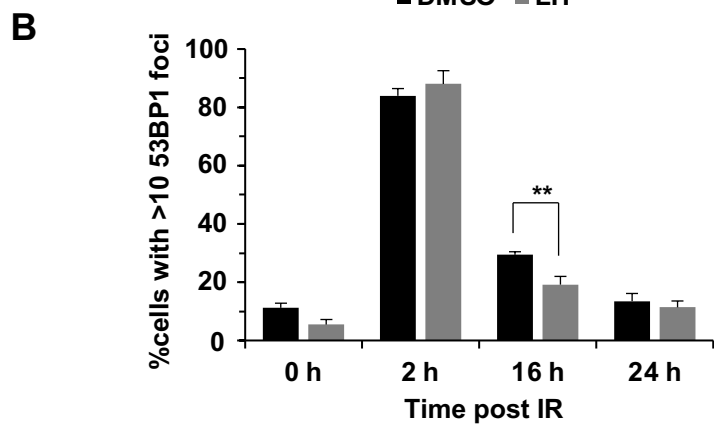

**Supplementary Figure 3**

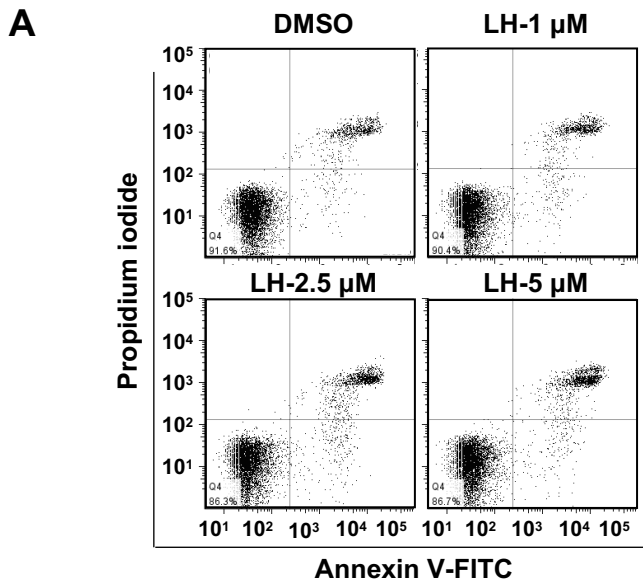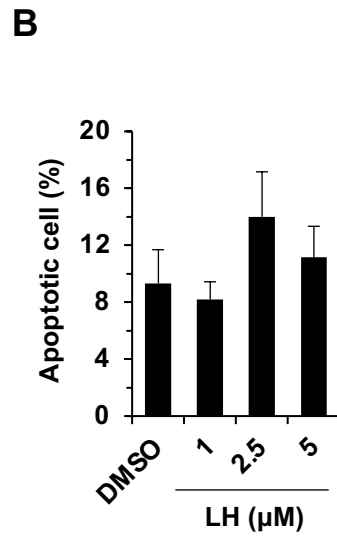

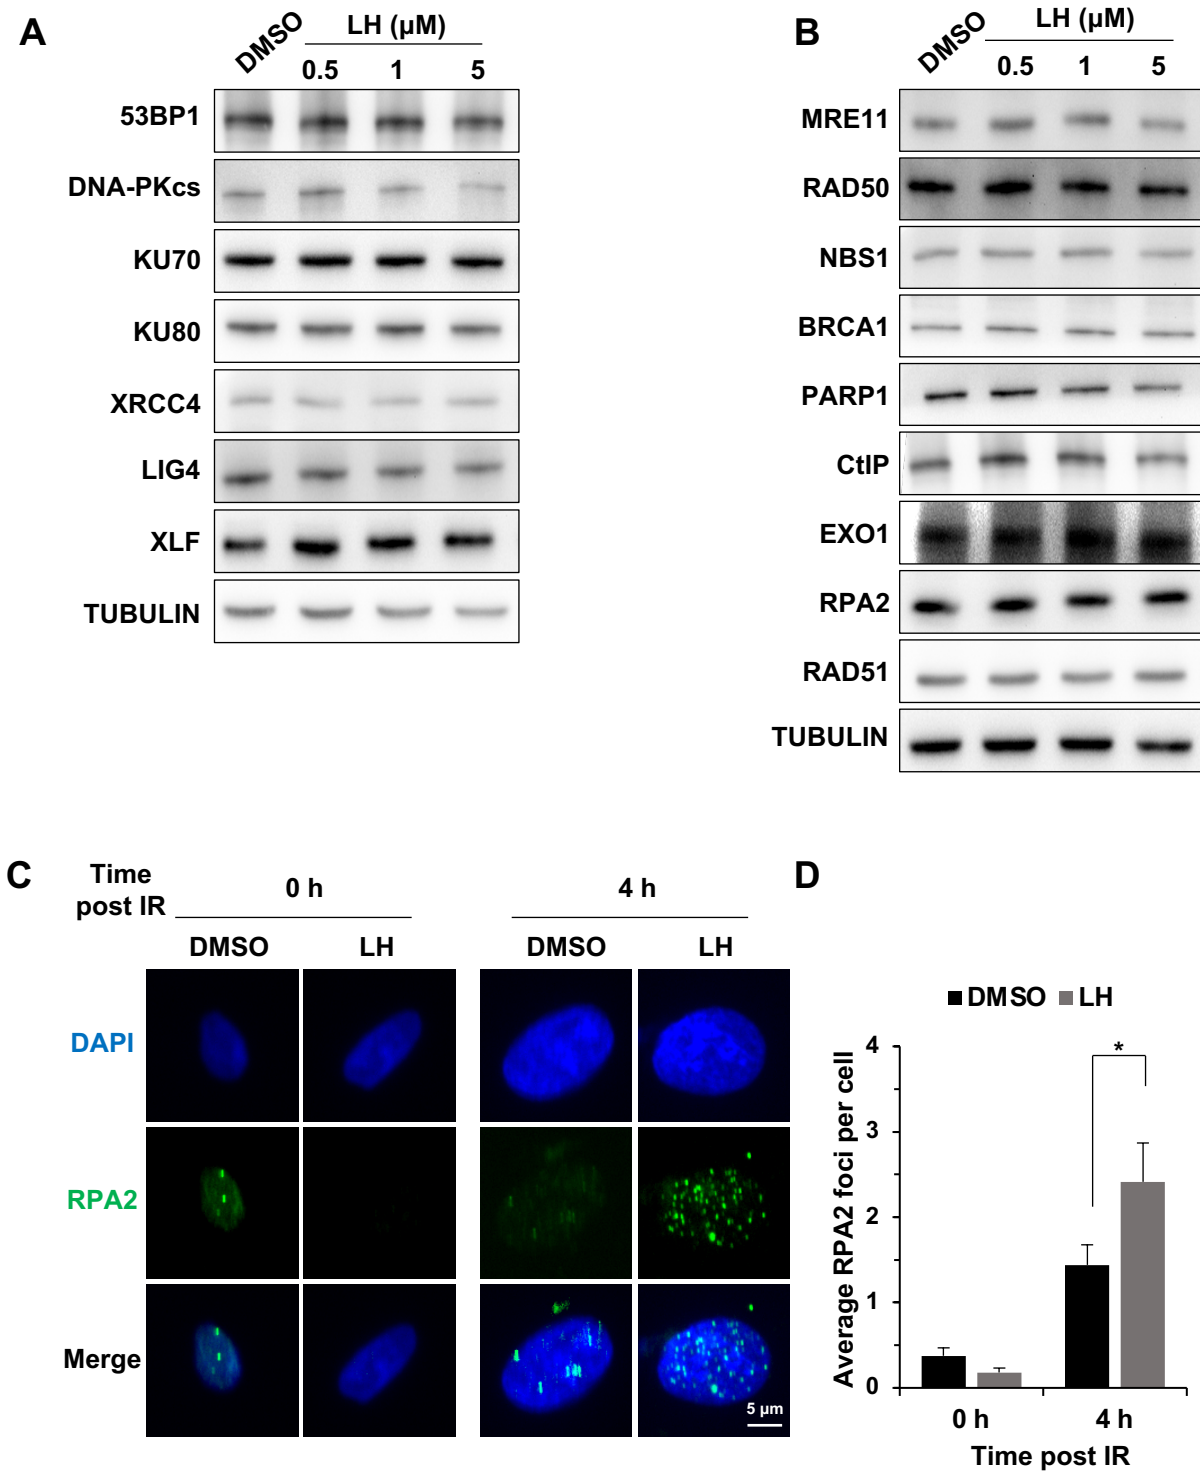

Supplementary Figure 5

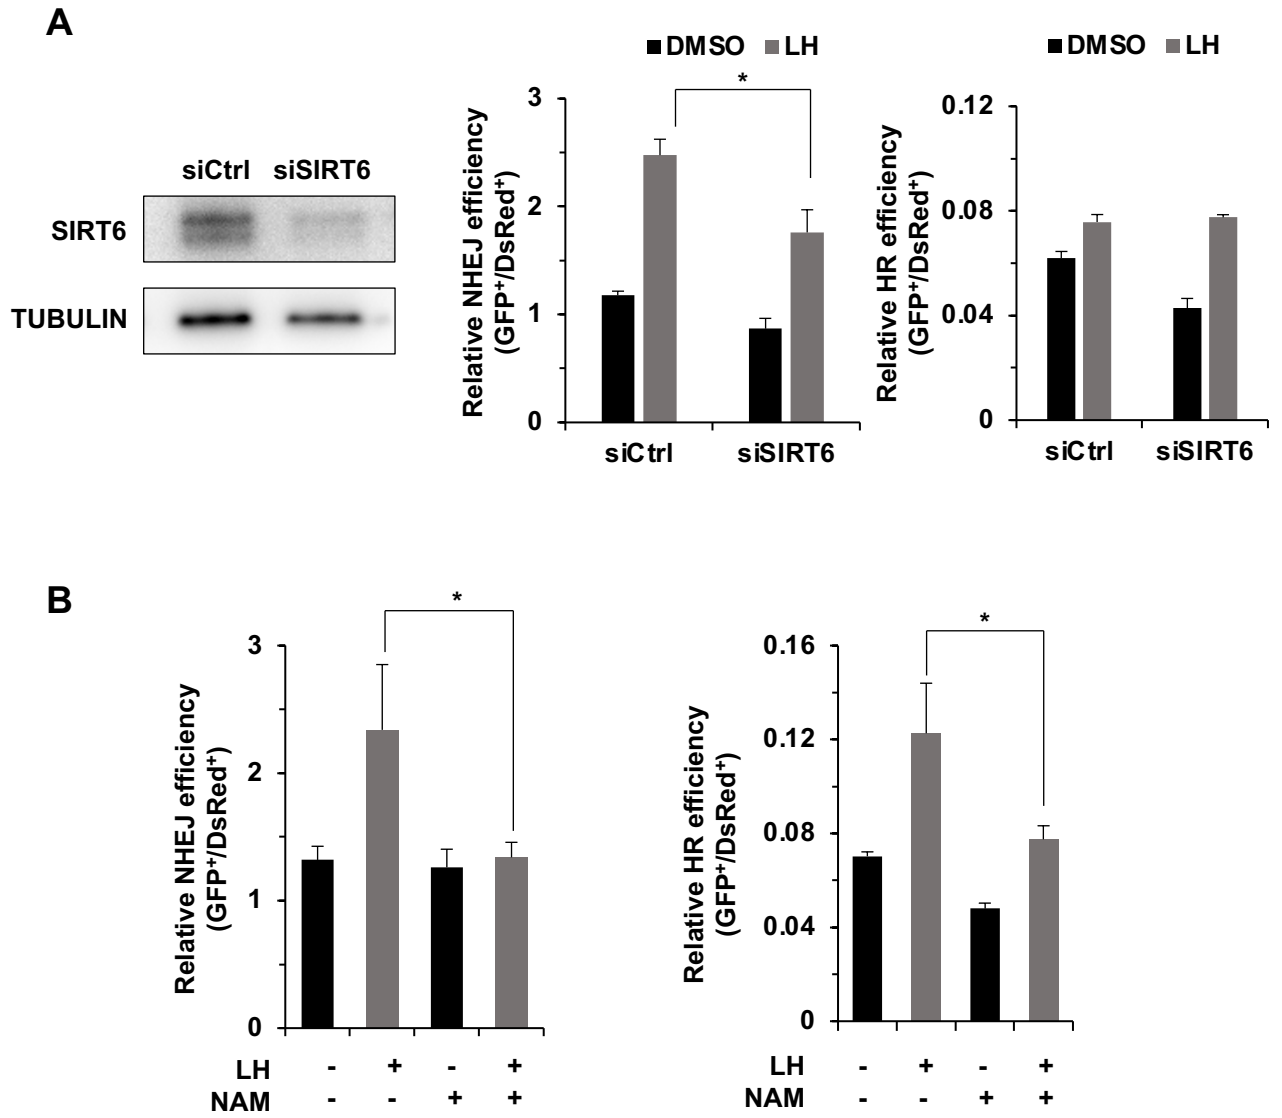

Supplementary Figure 6

**A**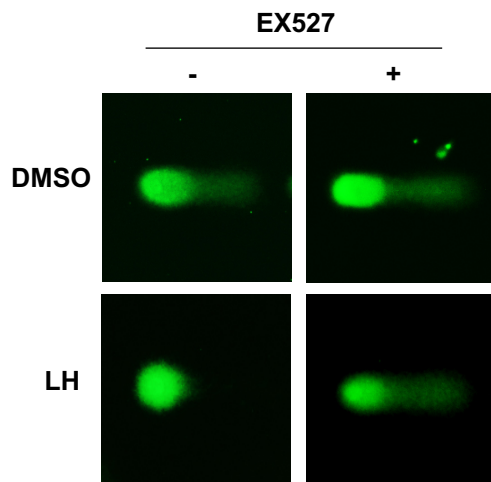**B**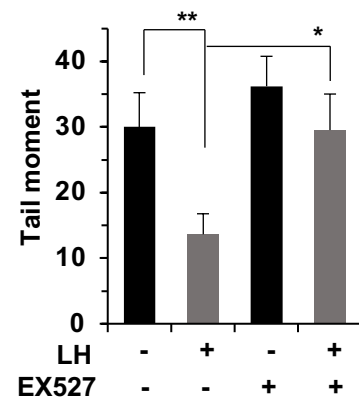**C**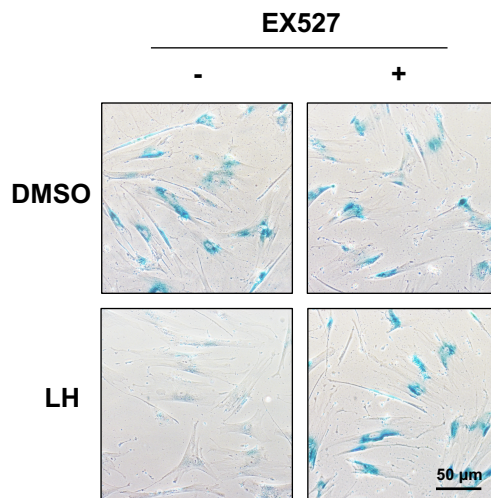**D**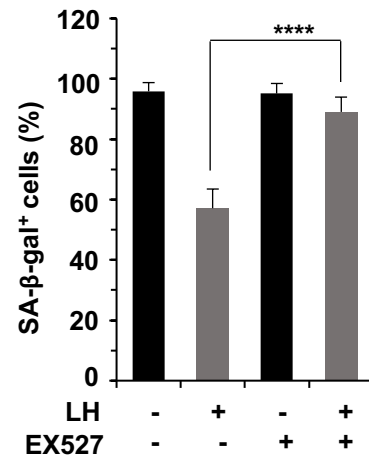**E**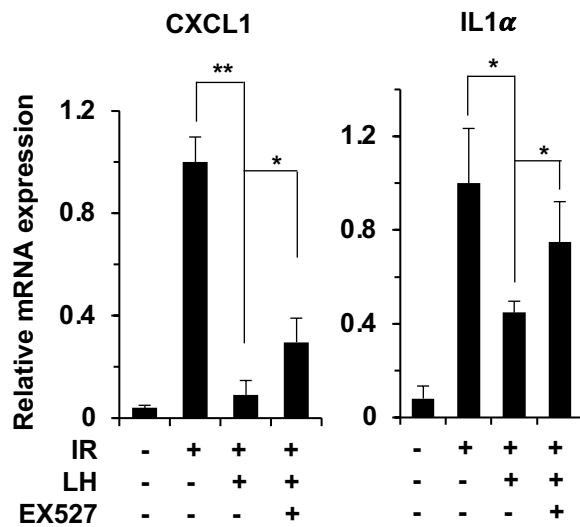

Supplement: ACEL-20-e13307-s001.pdf [file ACEL-20-e13307-s001.pdf]
